# Supplementary material for: AAVrh10 Vector Corrects Disease Pathology in MPS IIIA Mice and Achieves Widespread Distribution of SGSH in Large Animal Brains
Source: PubMed Central journal article supplement — Mol Ther Methods Clin Dev. 2019 Dec 10;17:174–87. doi: 10.1016/j.omtm.2019.12.001 (PMC6940615; doi:10.1016/j.omtm.2019.12.001), 2019-12-10
Supplement: mmc1.pdf [file mmc1.pdf]

**OMTM, Volume 17**

**Supplemental Information**

**AAVrh10 Vector Corrects Disease Pathology  
in MPS IIIA Mice and Achieves Widespread  
Distribution of SGSH in Large Animal Brains**

**Michaël Hocquemiller, Kim M. Hemsley, Meghan L. Douglass, Sarah J. Tamang, Daniel Neumann, Barbara M. King, Helen Beard, Paul J. Trim, Leanne K. Winner, Adeline A. Lau, Marten F. Snel, Cathy Gomila, Jérôme Ausseil, Xin Mei, Laura Giersch, Mark Plavsic, and Ralph Laufer**

Supplemental table

Table S1: Details of mice that were found dead/required euthanasia

| ID# found dead | ID# euthanazed | Age      | Gender | Genotype | Treatment | Pathology findings                                                                                                   |
|----------------|----------------|----------|--------|----------|-----------|----------------------------------------------------------------------------------------------------------------------|
| #498           |                | 9 weeks  | male   | MPS IIIA | medium    | NA (mice cannibalized)                                                                                               |
| #215           |                | 10 weeks | male   | MPS IIIA | vehicle   | The cause of death could not be determined by pathological examination                                               |
| #429           |                | 9 weeks  | female | MPS IIIA | medium    | The cause of death could not be determined by pathological examination                                               |
| #453           |                | 9 weeks  | female | MPS IIIA | high      | The cause of death could not be determined by pathological examination                                               |
| #497           |                | 10 weeks | male   | MPS IIIA | low       | NA (mice cannibalized)                                                                                               |
| #472           |                | 10 weeks | female | MPS IIIA | medium    | The cause of death could not be determined by pathological examination                                               |
|                | #319           | 11 weeks | male   | MPS IIIA | low       | Acute suppurative bacterial meningoencephalitis                                                                      |
| #427           |                | 18 weeks | male   | MPS IIIA | high      | NA (mice cannibalized)                                                                                               |
| #395           |                | 19 weeks | female | MPS IIIA | medium    | The cause of death could not be determined by pathological examination                                               |
|                | #424           | 20 weeks | male   | MPS IIIA | high      | The cause of death could not be determined by pathological examination                                               |
|                | #325           | 22 weeks | male   | MPS IIIA | vehicle   | Acute keratitis with corneal hyperplasia and focal intraepidermal microabscess formation with aggregated neutrophils |
| #341           |                | 23 weeks | male   | MPS IIIA | high      | NA (mice cannibalized)                                                                                               |
| #469           |                | 25 weeks | male   | MPS IIIA | medium    | NA (mice cannibalized)                                                                                               |
|                | #466           | 27 weeks | female | MPS IIIA | high      | The cause of death could not be determined by pathological examination                                               |

## Supplemental figures

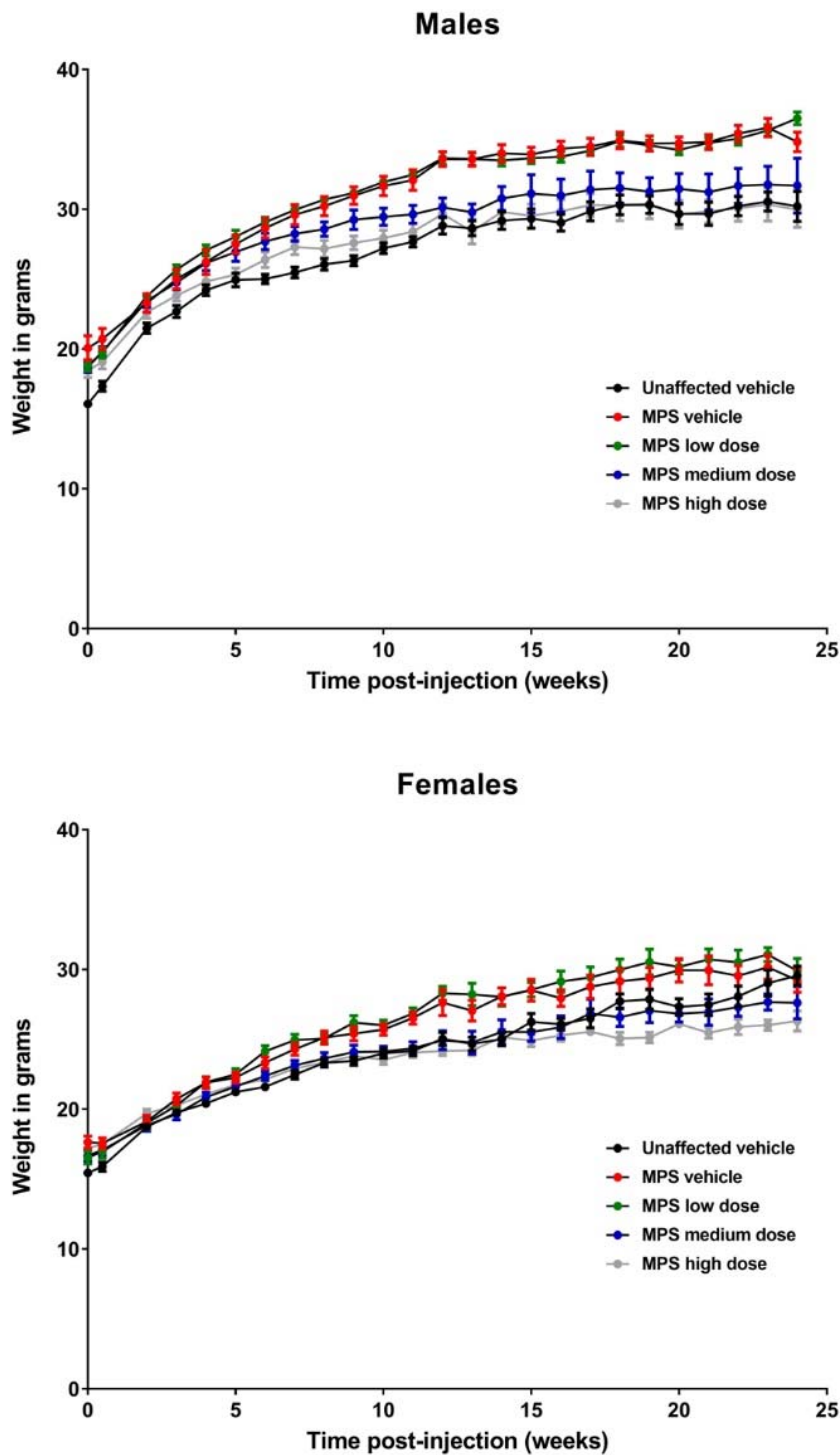

**Figure S1. Mouse body weights.**

Male and female mice received intra-cranial injections at 5-weeks of age and were weighed at least weekly up to 25-weeks post-injection. N=5-15 mice/group (N=5 mice/group remained at the final time-point). Data are mean  $\pm$  SEM. MPS vehicle and MPS low dose groups were significantly different from unaffected vehicle mice (Bonferroni test, both  $p < 0.0001$ ). The MPS mice that received the medium and high doses were not significantly different from unaffected vehicle mice (Bonferroni test,  $p = 0.499$  and  $p = 1.000$  respectively) suggesting that the body weight in these cohorts had been normalised with treatment.

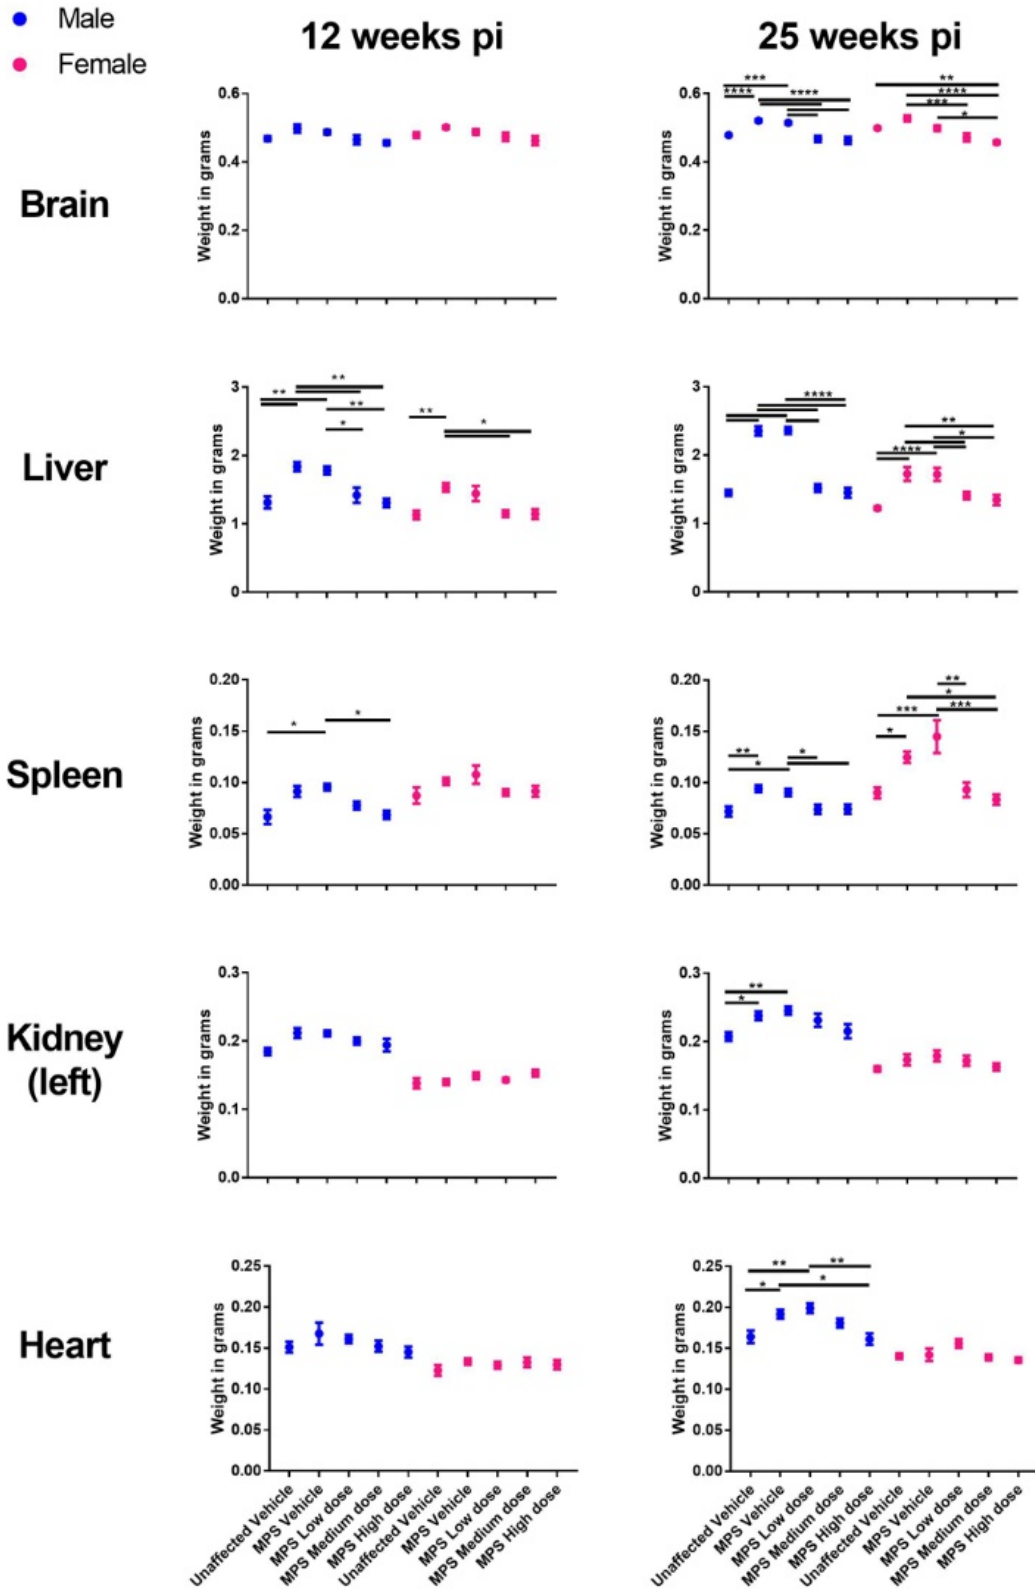

**Figure S2. Mouse organ weights at post-mortem.**

Weights of the organs were collected at post-mortem and have been graphed by gender. N=5 mice/group at 12 weeks post-injection. N=7-11 mice/group at 25-weeks post-injection. Data are mean  $\pm$  SEM. \*\*\*\*p < 0.0001, \*\*\*p < 0.001, \*\*p < 0.01, and \* p < 0.05 calculated from one-way ANOVA with Bonferroni's multiple comparisons test.

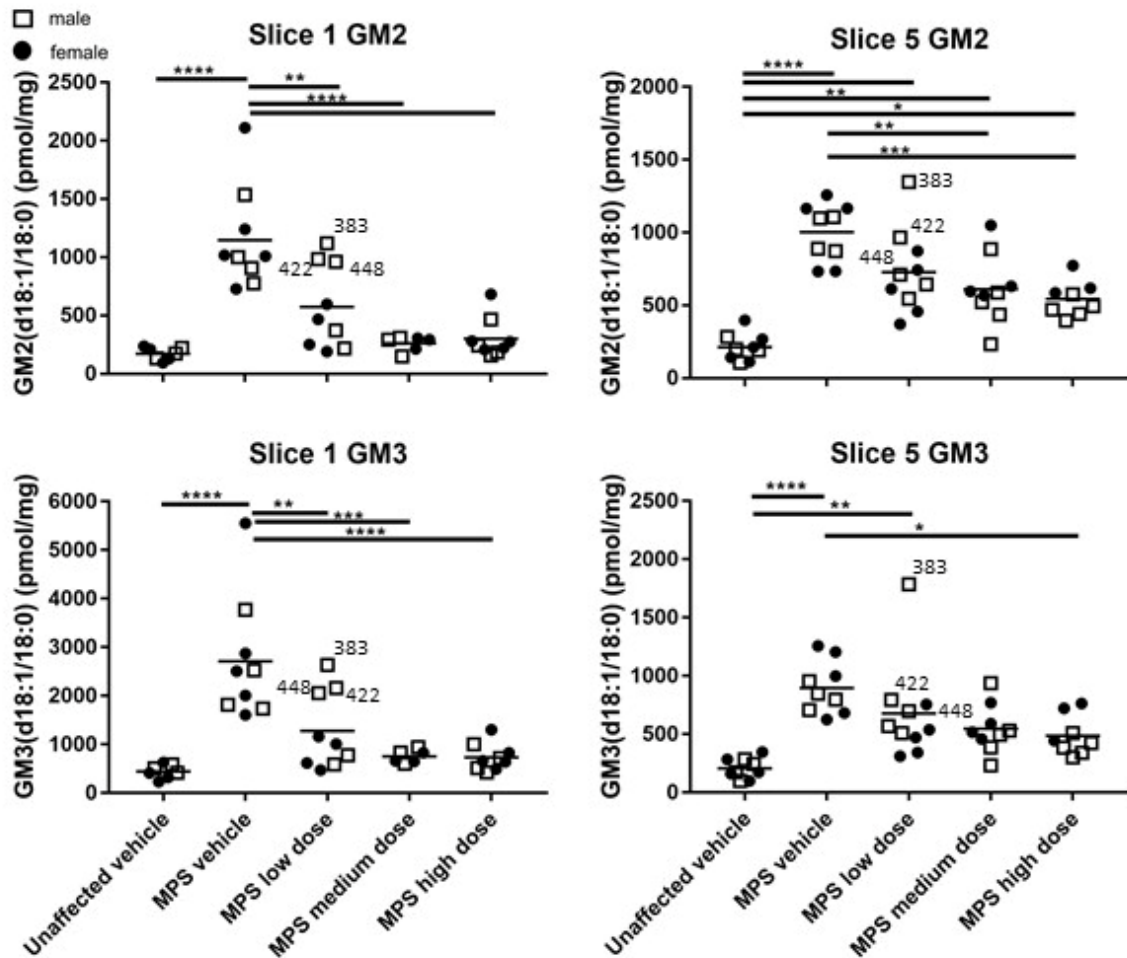

**Figure S3. GM2 and GM3 gangliosides at 25 weeks post-injection.**

Quantification of GM2 and GM3 gangliosides in mouse brain slices 1 and 5 according to the map given in Figure 1. N=6-10 mice/group. \*\*\*\* $p < 0.0001$ , \*\*\* $p < 0.001$ , \*\* $p < 0.01$ , and \*  $p < 0.05$  calculated from one-way ANOVA with Bonferroni's multiple comparisons test. Male low dose-treated MPS IIIA mice #422, #383 and #448 were outliers, exhibiting no reduction in gangliosides (c.f. MPS IIIA vehicle mice)

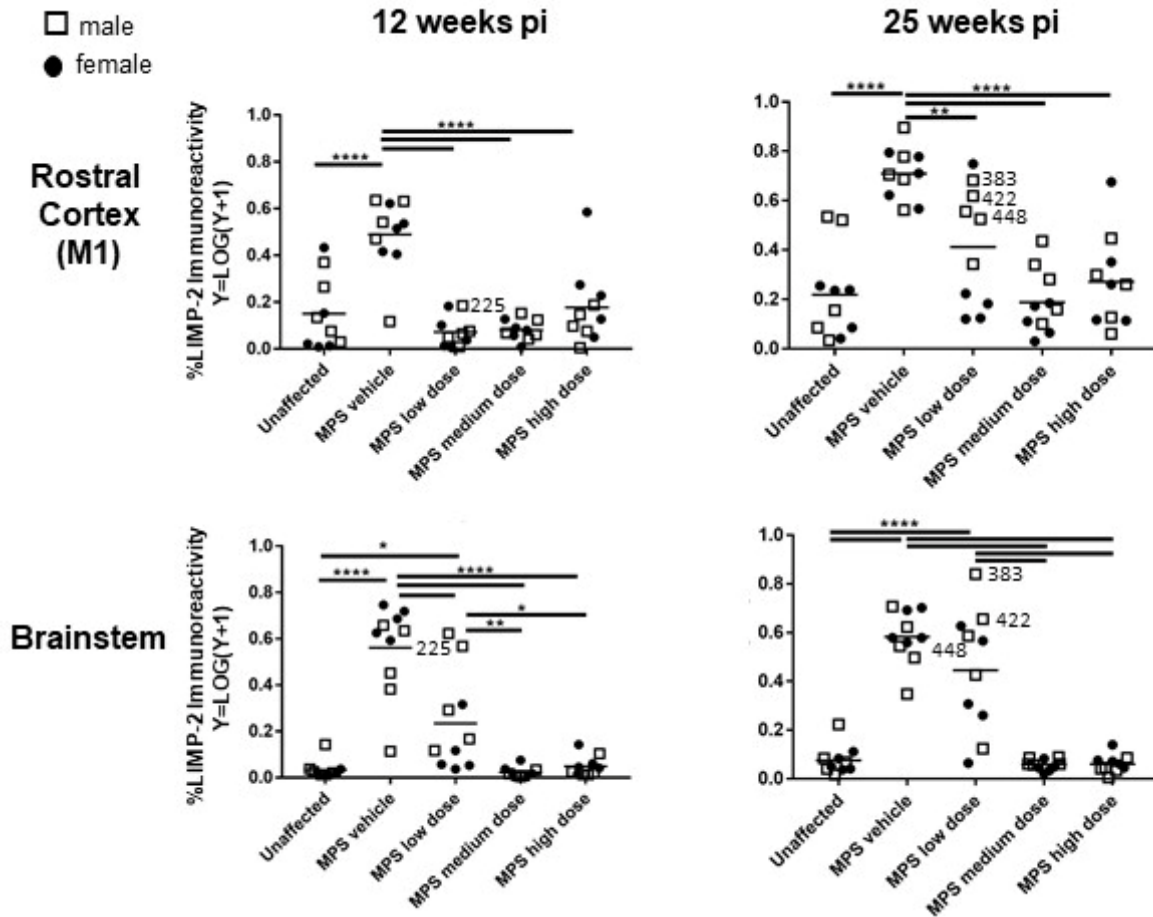

**Figure S4. Immunohistochemical staining of LIMP-2 in mouse brain sections at 12- and 25-weeks post-injection.**

\*\*\*\* $p < 0.0001$ , \*\*\* $p < 0.001$ , \*\* $p < 0.01$ , and \*  $p < 0.05$  calculated from one-way ANOVA with Bonferroni's multiple comparisons test. Mouse #225 (17-week old male MPS IIIA low dose group) and #422, #383 and #448 (30-week old male MPS IIIA low dose group) were outliers.

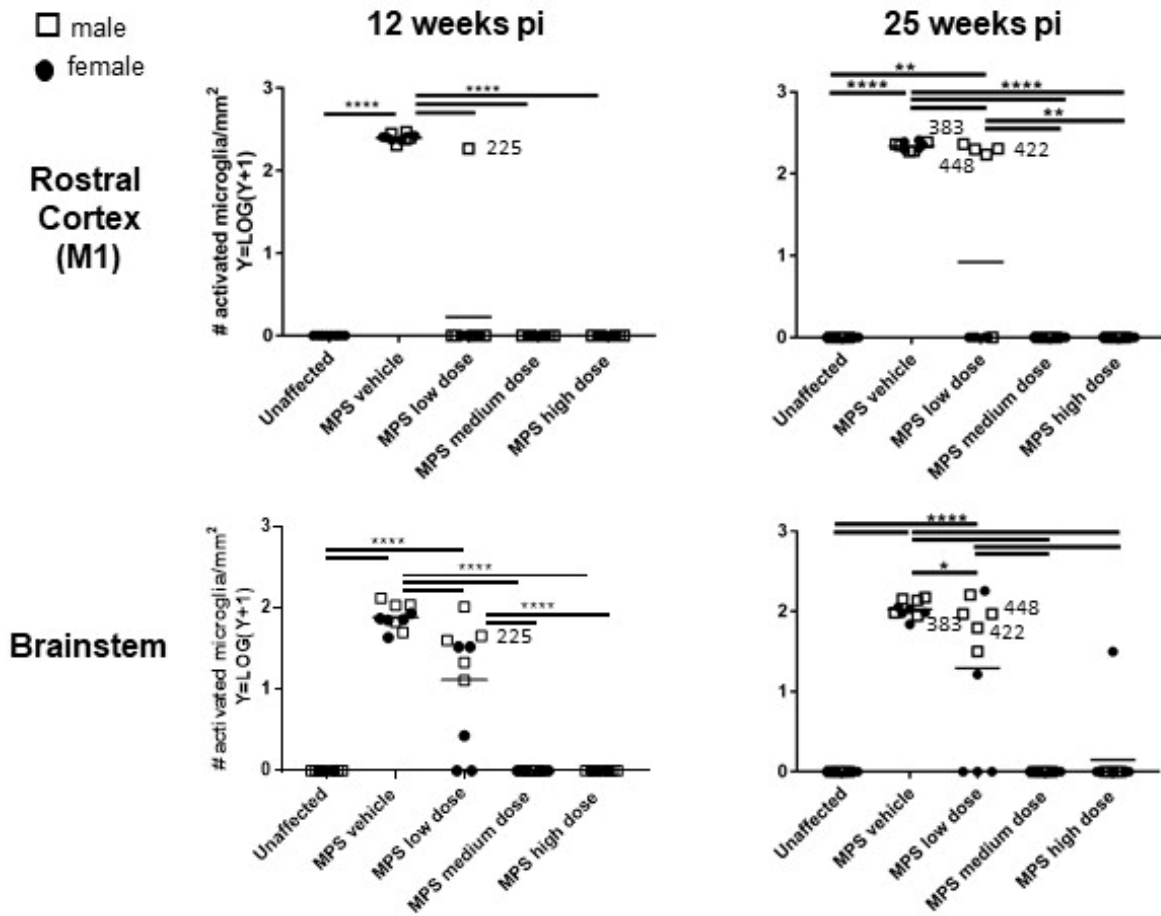

**Figure S5. Immunohistochemical staining of ubiquitin in mouse brain sections at 12- and 25-weeks post-injection.**

\*\*\*\* $p < 0.0001$ , \*\*\* $p < 0.001$ , \*\* $p < 0.01$ , and \*  $p < 0.05$  calculated from one-way ANOVA with Bonferroni's multiple comparisons test. Mouse #225 (17-week old male MPS IIIA low dose group) and #422, #383 and #448 (30-week old male MPS IIIA low dose group) were outliers.

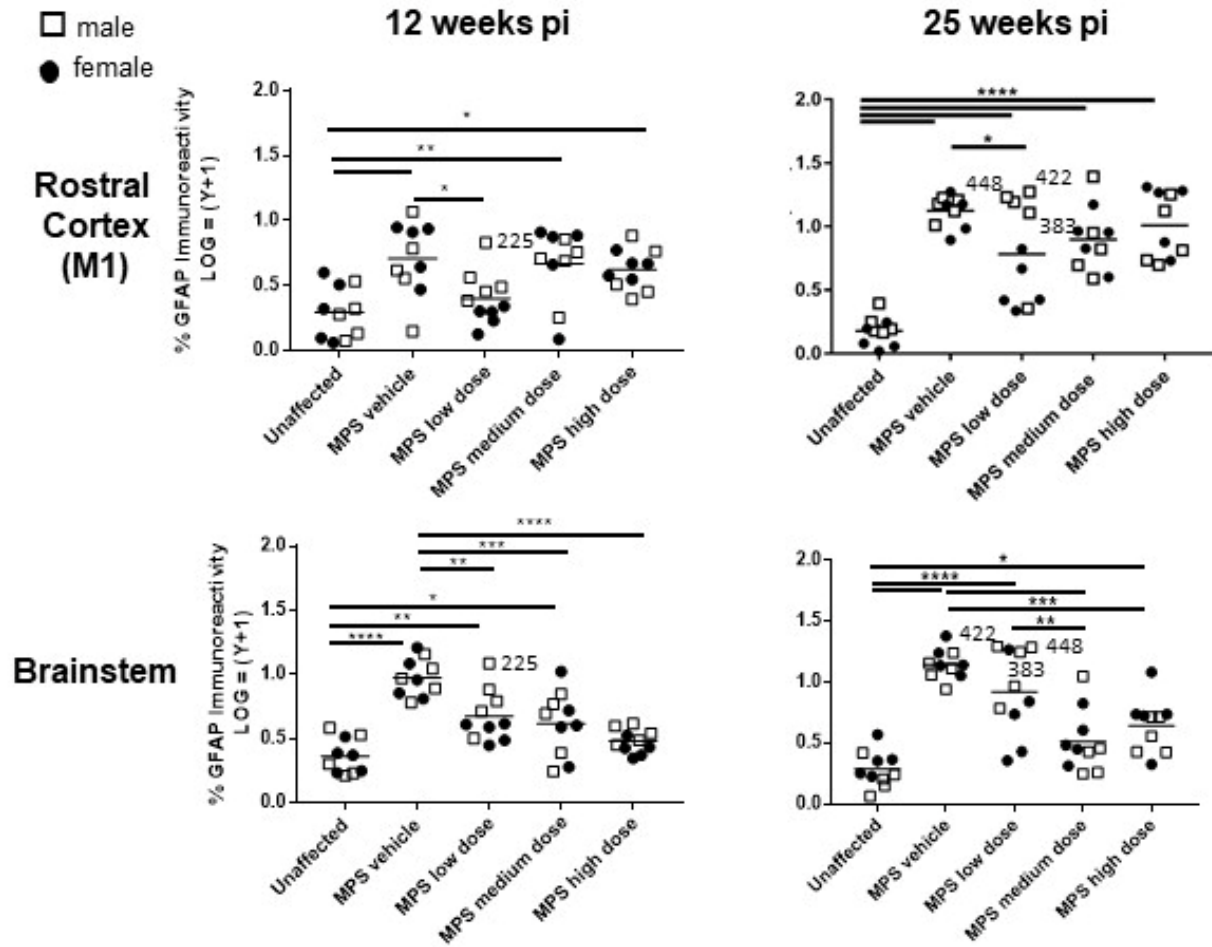

**Figure S6. Immunohistochemical staining of GFAP in mouse brain sections at 12- and 25-weeks post-injection.**

\*\*\*\* $p < 0.0001$ , \*\*\* $p < 0.001$ , \*\* $p < 0.01$ , and \*  $p < 0.05$  calculated from one-way ANOVA with Bonferroni's multiple comparisons test. Mouse #225 (17-week old male MPS IIIA low dose group) and #422, #383 and #448 (30-week old male MPS IIIA low dose group) were outliers.



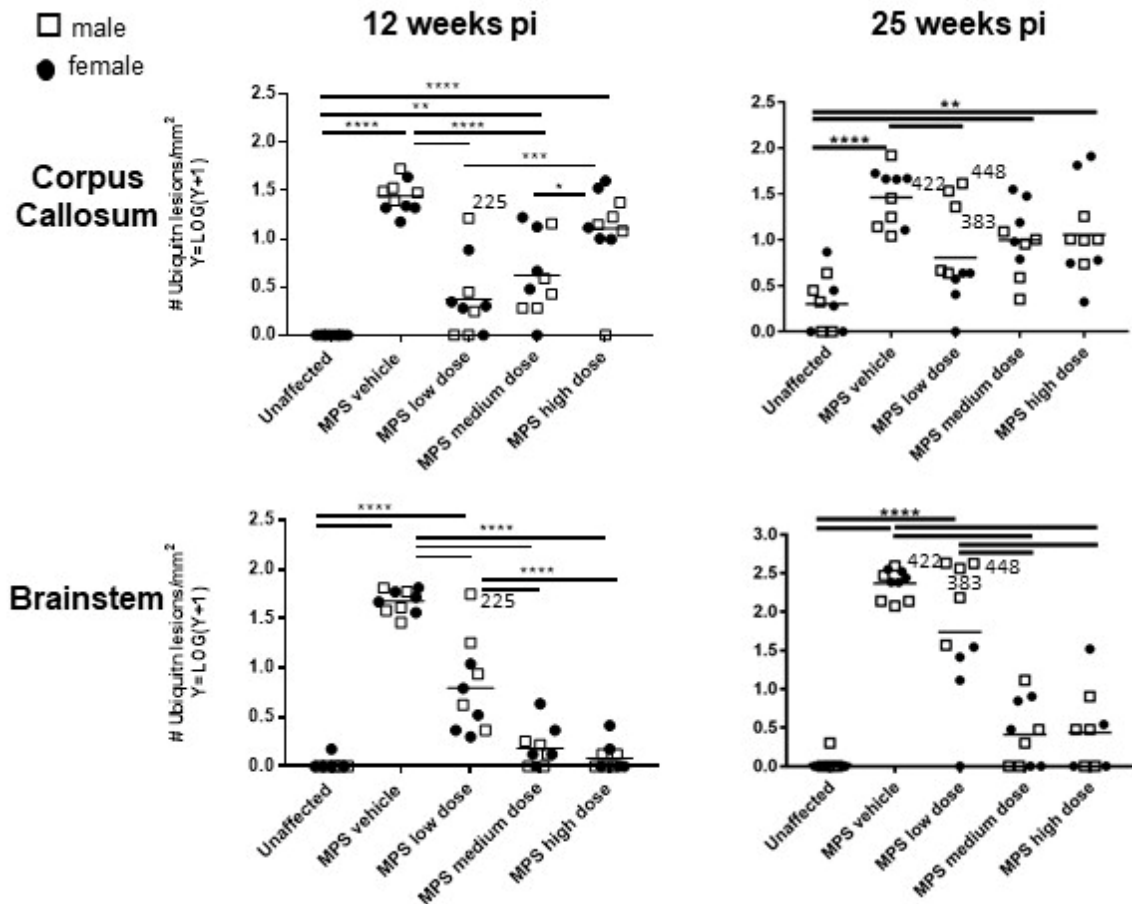

**Figure S7. Histochemical staining of IL4 in mouse brain sections at 12- and 25-weeks post-injection.**

\*\*\*\* $p < 0.0001$ , \*\*\* $p < 0.001$ , \*\* $p < 0.01$ , and \*  $p < 0.05$  calculated from one-way ANOVA with Bonferroni's multiple comparisons test. Mouse #225 (17-week old male MPS IIIA low dose group) and #422, #383 and #448 (30-week old male MPS IIIA low dose group) were outliers.

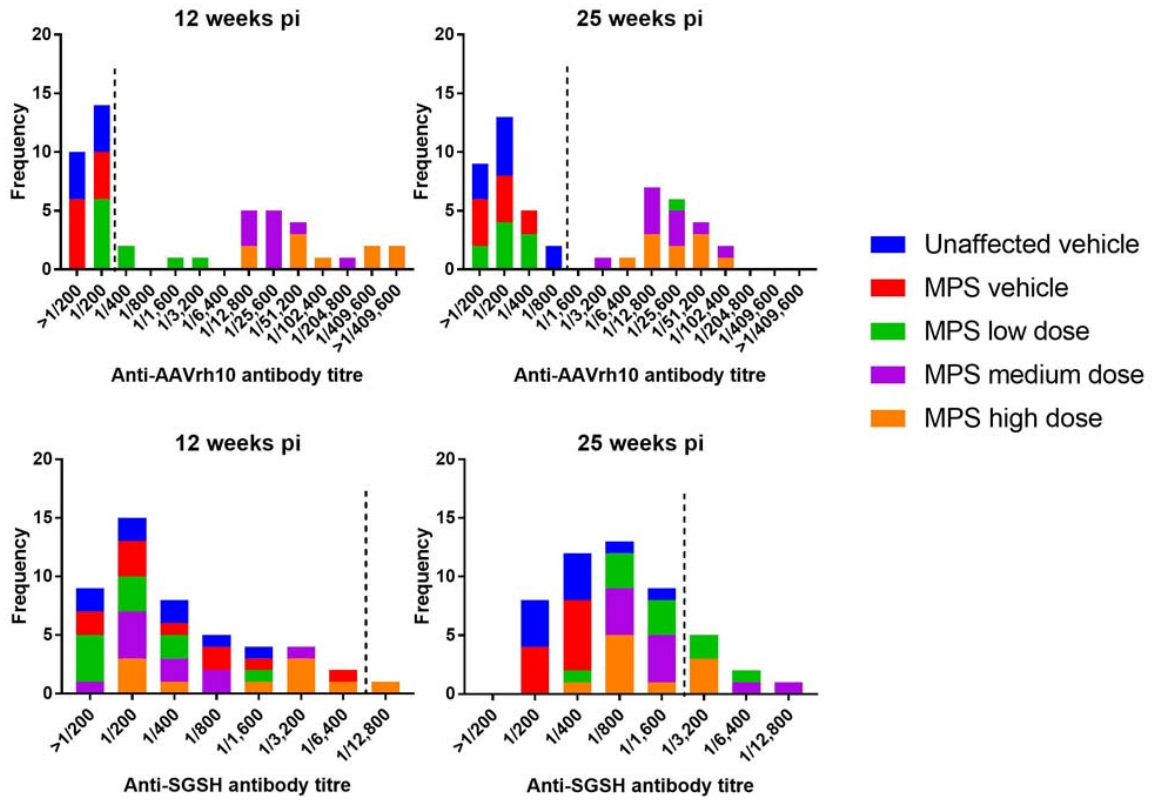

**Figure S8. Antibody Titres in mouse sera at 12- and 25-weeks post-injection.**

The dotted line indicates the highest dilution of serum from vehicle-treated animals that is 2SD above the blank.

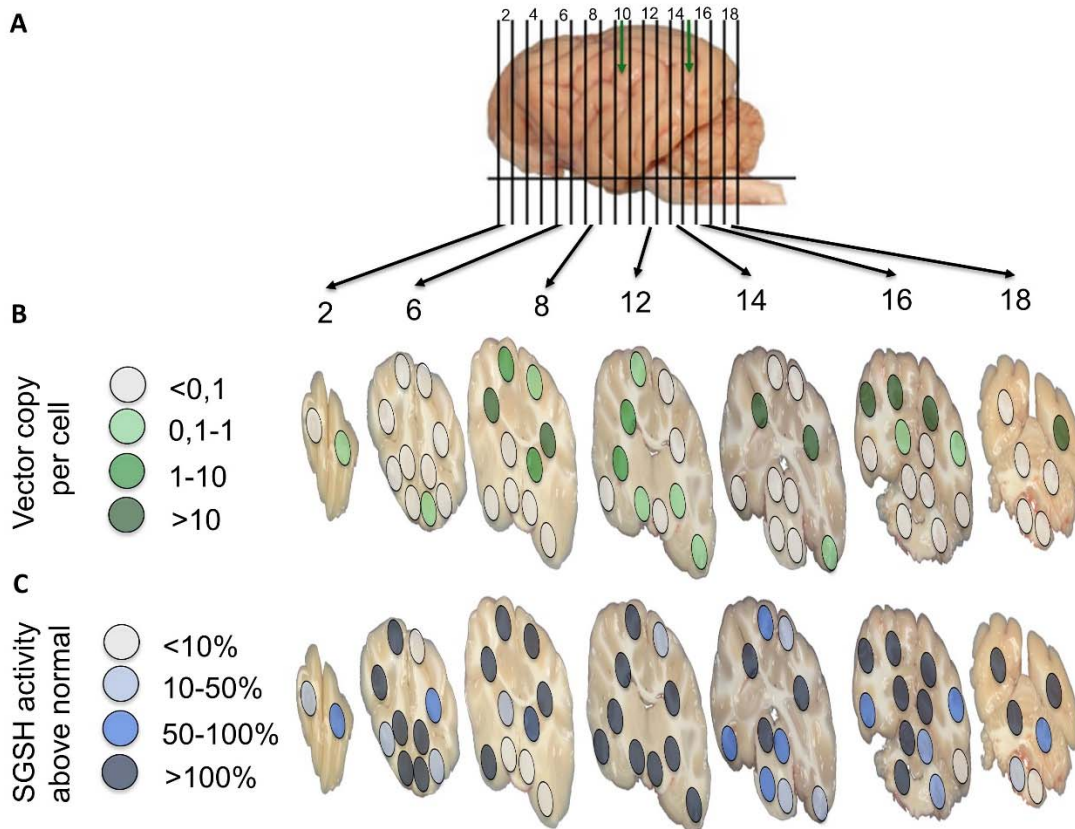

**Figure S9. Vector and enzyme activity biodistribution in dog brain.**

(A) Representation of brain slicing of a dog injected with 500 $\mu$ l in two sites per hemisphere (green arrows) for a total dose of  $2E+12$  vector genomes. (B) qPCR analysis were performed using PCR TaqMan method using primers and probe specific of the transgene and results (green dots) are expressed as mean vector copy per cell. (C) Enzyme activity analysis were performed using the 2 steps method resulting in the release of measurable 4-MU fluorescent substance. Results (blue dots) were normalized as % of endogenous activity determined as mean value of 80 punches from 2 PBS injected hemispheres of 2 distinct dogs.

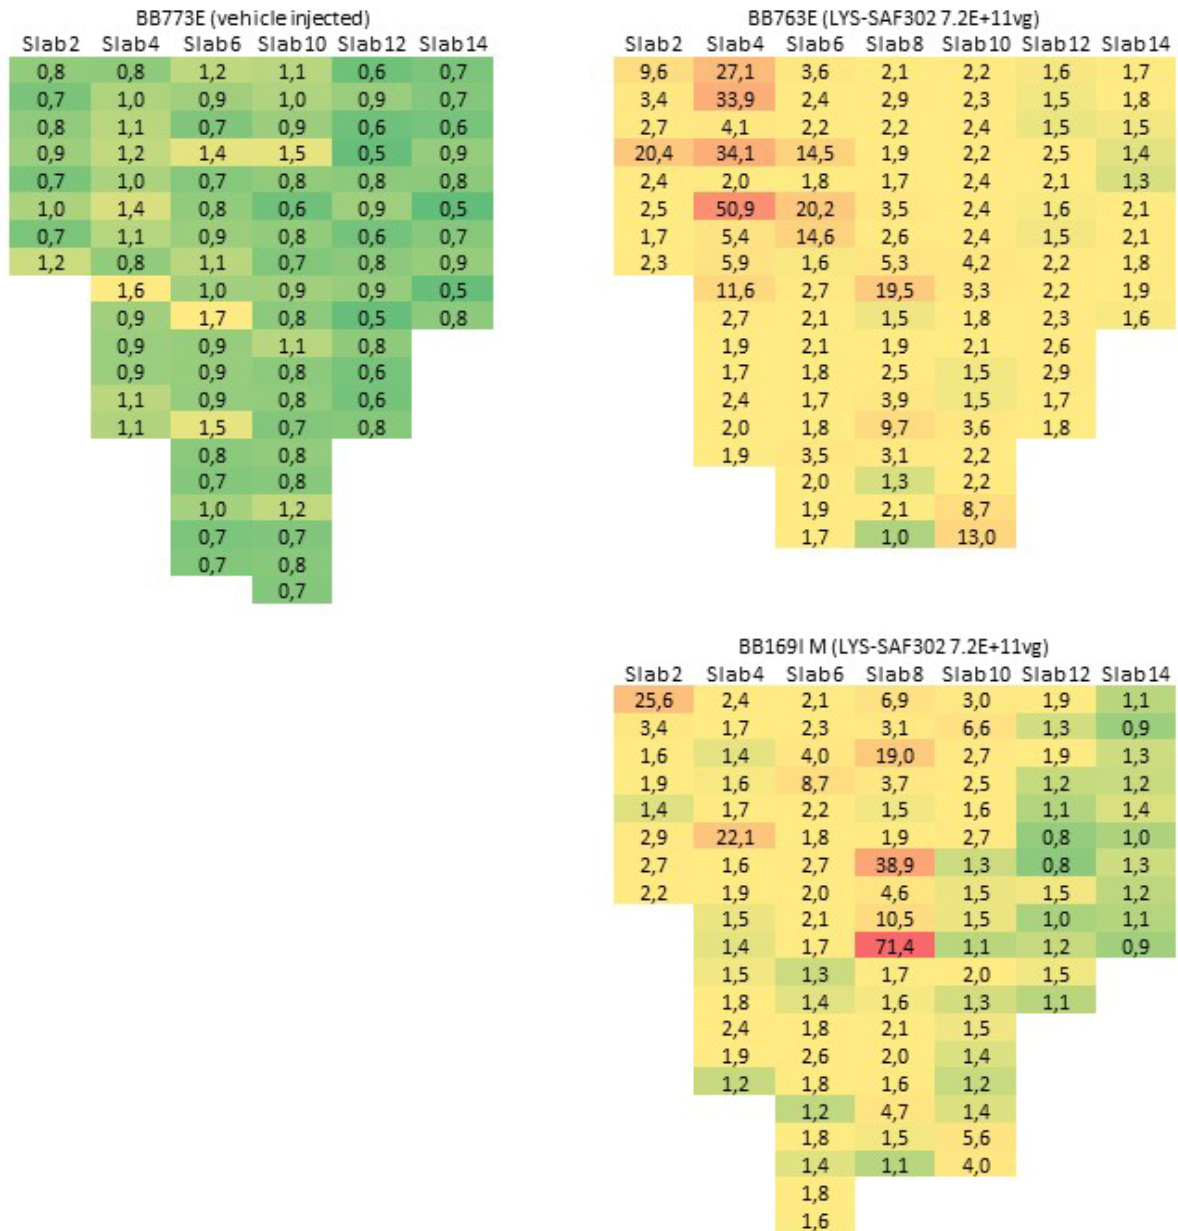

**Figure S10: Numerical data of SGSH activity in NHP brain.**

Representation of SGSH activity data in the brain samples of the vehicle injected animal (NHP#BB773E) and two NHP that received four injections of 50  $\mu$ L (two per hemisphere) of LYS-SAF302 into the white matter at 5  $\mu$ L/min at a total dose 7.2E+11vg (NHP#BB763E and NHP#BB169I). Results of each analysed brain punches from each brain slabs (see Figure 6) are expressed as nmol/h/mg with color code reflecting relative values (lowest activity in green and highest activity in red).
